# Magnetic resonance imaging of cardiac metabolism in heart failure: how far have we come?

Salva R. Yurista <sup>1,2</sup>, Robert A. Eder <sup>1,2</sup>, Deborah H. Kwon <sup>3</sup>,  
Christian T. Farrar <sup>2</sup>, Yi-Fen Yen <sup>2</sup>, W.H. Wilson Tang<sup>3</sup>,  
and Christopher T. Nguyen <sup>1,2,4,5\*</sup>

<sup>1</sup>Cardiovascular Research Center, Corrigan Minehan Heart Center, Massachusetts General Hospital, Harvard Medical School, 149 13th St, Charlestown, MA 02129, USA; <sup>2</sup>Athinoula A. Martinos Center for Biomedical Imaging, Massachusetts General Hospital, Harvard Medical School, 149 13th St, Charlestown, MA 02129, USA; <sup>3</sup>Department of Cardiovascular Medicine, Heart, Vascular, and Thoracic Institute, Cleveland Clinic, 9500 Euclid Avenue, Cleveland, OH 44195, USA; <sup>4</sup>Division of Health Science Technology, Harvard-Massachusetts Institute of Technology, 77 Massachusetts Ave, Cambridge, MA 02139, USA; and <sup>5</sup>Cardiovascular Innovation Research Center, Heart, Vascular, and Thoracic Institute, Cleveland Clinic, Cleveland, 9500 Euclid Avenue, Cleveland, OH 44195, USA

Received 20 April 2022; revised 6 June 2022; accepted 10 June 2022; online publish-ahead-of-print 5 July 2022

As one of the highest energy consumer organs in the body, the heart requires tremendous amount of adenosine triphosphate (ATP) to maintain its continuous mechanical work. Fatty acids, glucose, and ketone bodies are the primary fuel source of the heart to generate ATP with perturbations in ATP generation possibly leading to contractile dysfunction. Cardiac metabolic imaging with magnetic resonance imaging (MRI) plays a crucial role in understanding the dynamic metabolic changes occurring in the failing heart, where the cardiac metabolism is deranged. Also, targeting and quantifying metabolic changes *in vivo* noninvasively is a promising approach to facilitate diagnosis, determine prognosis, and evaluate therapeutic response. Here, we summarize novel MRI techniques used for detailed investigation of cardiac metabolism in heart failure including magnetic resonance spectroscopy (MRS), hyperpolarized MRS, and chemical exchange saturation transfer based on evidence from preclinical and clinical studies and to discuss the potential clinical application in heart failure.

.....

\* Corresponding author. Tel: 216-219-7053, Email: [nguyenc6@ccf.org](mailto:nguyenc6@ccf.org)

© The Author(s) 2022. Published by Oxford University Press on behalf of the European Society of Cardiology. All rights reserved. For permissions, please email: [journals.permissions@oup.com](mailto:journals.permissions@oup.com).

## Graphical Abstract

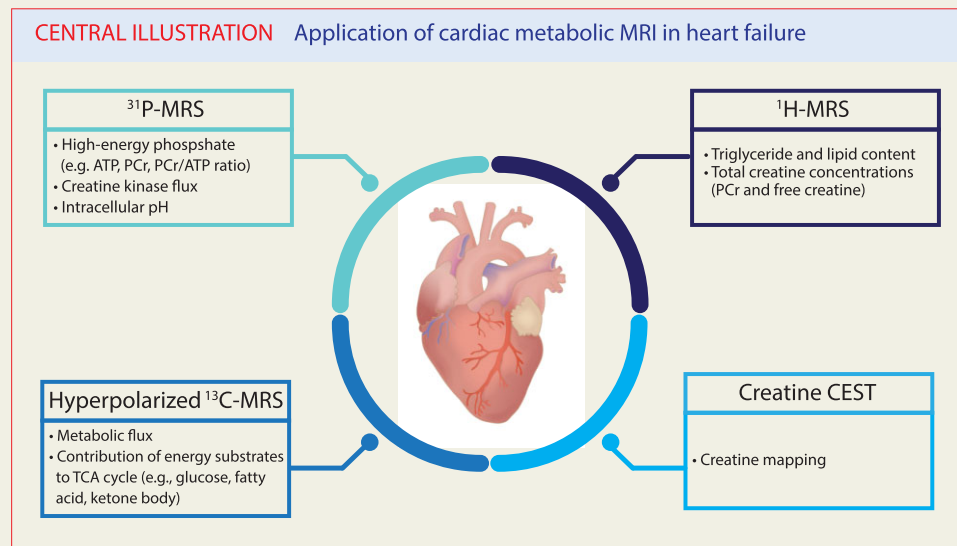

Key parameters of cardiac metabolic MRI for the assessment of myocardial metabolism in heart failure. ATP, adenosine triphosphate; MRI, magnetic resonance imaging; PCr, phosphocreatine; TCA, tricarboxylic acid.

**Keywords**

cardiac metabolism • heart failure • magnetic resonance imaging • magnetic resonance spectroscopy • hyperpolarized MRS

**Highlights**

- The chronically failing heart has been shown to be metabolically abnormal.
- Cardiac metabolic magnetic resonance imaging (MRI) provides comprehensive information about various aspects of myocardial metabolism *in vivo* [e.g. high-energy phosphate, creatine kinase (CK) system, lipid content, metabolic flux], suited for a real-time and serial follow-up study due to its non-invasive nature.
- Cardiac metabolic MRI has the potential to emerge as a non-invasive tool to facilitate diagnosis, monitor disease progression, determine prognosis, and evaluate the effects of therapy in heart failure (HF).

Metabolic flexibility is essential for a healthy heart to function properly under constantly changing milieu conditions.<sup>1</sup> Although making up only a small fraction of our total body mass, the heart consumes more energy per gram of tissue than any other human organ. Of this, the heart consumes around 6 kg of adenosine triphosphate (ATP) per day, about 15–20 times of its own weight.<sup>2,3</sup> Within the heart, increased energy demands drive compensatory metabolic changes to maintain energy homeostasis by switching metabolic substrates. Adult heart primarily utilize fatty acid (FA), a small amount of glucose, and to some extent also ketone bodies.<sup>4</sup> The contribution of these substrates to ATP production depends on the substrate availability,

hormonal status, dietary pattern, energy demand, and 'metabolic flexibility' of the heart.<sup>1,5</sup>

The myocardial CK system plays a vital role in rapid energy supply during increased workload, because it can supply ATP faster than that from other pathways.<sup>6</sup> Creatine has long been regarded as a vital metabolite in the network of energy transfer,<sup>7</sup> as it can be phosphorylated into phosphocreatine (PCr) which acts as an energy buffer to maintain ATP constant concentrations constant.<sup>3</sup> With the development of HF, the metabolic flexibility of the heart is diminished.<sup>2,8</sup> This results in up to ~30% reduction in ATP production and consequently affects cardiac contractility.<sup>7</sup> The decline in high-energy phosphate metabolism has important implications in HF and is correlated with LV dysfunction severity.<sup>7,9</sup>

Recent data from animals and human studies suggest that the failing heart shifts from using FAs as the preferred substrate to become more reliant on glucose oxidation with associated increases in ketone metabolism; however, the relative contribution of these substrates to total ATP production is relatively low.<sup>2,10</sup> Over the past decade, there has been a growing interest in targeting cardiac metabolism as a therapeutic approach for HF.<sup>11</sup> Research exploring the unique metabolic remodelling of the failing heart has led to the proposal of a new metabolic treatment for HF, including ketone bodies, that may enhance cardiac energetics and exert pleiotropic effects in a way that could be beneficial for the failing heart.<sup>5,12,13</sup>

Noninvasive assessment of myocardial energy production *in vivo* in healthy state and perturbed cardiac metabolism observed in HF is important as it may provide a better understanding of HF

**Table 1** Cardiometabolic MRI studies in humans with HF

| First author and year                 | Imaging method              | N, participants                                                                                                                  | Major outcomes                                                                                                                                                                                                                                                                                                                                         |
|---------------------------------------|-----------------------------|----------------------------------------------------------------------------------------------------------------------------------|--------------------------------------------------------------------------------------------------------------------------------------------------------------------------------------------------------------------------------------------------------------------------------------------------------------------------------------------------------|
| Neubauer <i>et al.</i> <sup>14</sup>  | Cardiac <sup>31</sup> P-MRS | 33 patients (14 with CAD and 19 with DCM) and 19 healthy controls                                                                | Cardiac high-energy phosphate metabolism at rest was normal in LAD stenosis and chronic MI in the absence of HF; and that it was correlated with HF severity in DCM.                                                                                                                                                                                   |
| Weiss <i>et al.</i> <sup>15</sup>     | Cardiac <sup>31</sup> P-MRS | 16 patients with CAD and ischaemia, 9 with nonischaemic heart disease, and 11 healthy controls                                   | During hand-grip exercise, myocardial PCr/ATP ratio was reduced in patients with CAD and ischaemia, while patients with non-ischaemic cardiomyopathy and those with ischaemic heart disease after revascularization therapy had preserved myocardial PCr/ATP.                                                                                          |
| Neubauer <i>et al.</i> <sup>16</sup>  | Cardiac <sup>31</sup> P-MRS | 39 patients with DCM                                                                                                             | Myocardial PCr/ATP ratio was correlated with LVEF, and it was a significant predictor both total and cardiovascular mortality in DCM.                                                                                                                                                                                                                  |
| Okada <i>et al.</i> <sup>17</sup>     | Cardiac <sup>31</sup> P-MRS | 10 patients with HCM and 15 healthy controls                                                                                     | Both PCr and ATP content were lower in patients with HCM.                                                                                                                                                                                                                                                                                              |
| Beer <i>et al.</i> <sup>18</sup>      | Cardiac <sup>31</sup> P-MRS | 10 patients with DCM and 10 healthy controls                                                                                     | PCr was reduced by 51%, ATP by 35%, and PCr/ATP by 25% in patients with DCM. Myocardial energetic was correlated with functional parameters (LV volume, EF), with the strongest correlations for PCr.                                                                                                                                                  |
| Weiss <i>et al.</i> <sup>19</sup>     | Cardiac <sup>31</sup> P-MRS | 17 patients with HF and 16 normal subjects                                                                                       | Cardiac PCr was reduced 18% in CHF patients. ATP concentrations were unchanged. CK flux was reduced 50% compared with normal subjects.                                                                                                                                                                                                                 |
| Hansch <i>et al.</i> <sup>20</sup>    | Cardiac <sup>31</sup> P-MRS | 20 healthy controls and 15 patients with severe symptoms (LVEF < 30%) and 10 patients with moderate symptoms (LVEF > 30%) of DCM | Reduced PCr/ATP ratio was observed in patients suffering from DCM.                                                                                                                                                                                                                                                                                     |
| Lee <i>et al.</i> <sup>21</sup>       | <sup>31</sup> P-MRS         | 56 patients with CHF                                                                                                             | Treatment with perhexiline led to significant improvements in skeletal muscle PCr recovery by 34%.                                                                                                                                                                                                                                                     |
| Chida <i>et al.</i> <sup>22</sup>     | Cardiac <sup>31</sup> P-MRS | 20 cardiac patients (13 DCM, 3 HCM, 3 HHD, and 1 aortic regurgitation)                                                           | The myocardial PCr/ATP ratio was significantly lower in DCM patients (1.82 ± 0.33), and in patients with global myocardial dysfunction (1.89 ± 0.32) than in healthy volunteers (2.96 ± 0.59).                                                                                                                                                         |
| Smith <i>et al.</i> <sup>23</sup>     | Cardiac <sup>31</sup> P-MRS | 20 LVH patients with and without CHF, and 14 healthy controls                                                                    | Mean myocardial cardiac PCr was reduced by 30% in both LVH and LVH with CHF, without any changes in ATP. No difference between LVH group with and without CHF. Net CK flux was reduced by 30% in the LVH group. Mean CK flux was reduced by 65% and 30% in the LVH with CHF group when compared with normal subjects and those with LVH, respectively. |
| Shivu <i>et al.</i> <sup>24</sup>     | Cardiac <sup>31</sup> P-MRS | 26 patients with HCM and 37 healthy controls                                                                                     | The PCr/ATP ratio was significantly reduced in HCM patients compared to controls (1.42 ± 0.51 and 2.11 ± 0.57, respectively).                                                                                                                                                                                                                          |
| Hirsch <i>et al.</i> <sup>25</sup>    | Cardiac <sup>31</sup> P-MRS | 16 patients with nonischaemic cardiomyopathy                                                                                     | Treatment with allopurinol increased PCr/ATP ratio, PCr concentration, CK flux, free energy of ATP hydrolysis in the failing heart.                                                                                                                                                                                                                    |
| Bottomley <i>et al.</i> <sup>26</sup> | Cardiac <sup>31</sup> P-MRS | 58 HF patients with nonischaemic cardiomyopathy                                                                                  | During follow up for a median 4.7 years, risk of HF-related composite outcomes decreased by 32–39% for every 1 μmol g <sup>-1</sup> s <sup>-1</sup> increase in CK flux.                                                                                                                                                                               |
| Beadle <i>et al.</i> <sup>27</sup>    | Cardiac <sup>31</sup> P-MRS | 50 patients with nonischaemic HF                                                                                                 | Perhexiline therapy was associated with a 30% increase in the PCr/ATP ratio (vs. a 3% decrease with placebo).                                                                                                                                                                                                                                          |
| Dass <i>et al.</i> <sup>28</sup>      | Cardiac <sup>31</sup> P-MRS | 35 HCM patients and 20 healthy controls at rest and during leg exercise                                                          | Resting PCr/ATP ratio was significantly reduced in HCM than control (1.71 ± 0.35, vs. 2.14 ± 0.35 respectively). There was a further reduction in PCr/ATP in HCM group during exercise (1.56 ± 0.29, compared with rest) but not in healthy controls.                                                                                                  |
| Schär <i>et al.</i> <sup>29</sup>     | Cardiac <sup>31</sup> P-MRS | 17 patients with HF and 12 healthy subjects                                                                                      | Using two-repetition time ST (TwIST) method, significant reductions in the pseudo-first-order rate constant (CK k <sub>i</sub> ) was detected in HF patients compared to healthy subjects.                                                                                                                                                             |

Continued

**Table 1 Continued**

| First author and year            | Imaging method              | N, participants                                                                                                                                                                                                                                                     | Major outcomes                                                                                                                                                                                                                                                                                                                         |
|----------------------------------|-----------------------------|---------------------------------------------------------------------------------------------------------------------------------------------------------------------------------------------------------------------------------------------------------------------|----------------------------------------------------------------------------------------------------------------------------------------------------------------------------------------------------------------------------------------------------------------------------------------------------------------------------------------|
| Stoll et al. <sup>30</sup>       | Cardiac <sup>31</sup> P-MRS | 25 patients with DCM and 10 healthy controls                                                                                                                                                                                                                        | Patients with DCM had a significantly lower PCr/ATP than healthy subjects ( $1.54 \pm 0.39$ vs $1.95 \pm 0.25$ ).                                                                                                                                                                                                                      |
| Gabr et al. <sup>31</sup>        | Cardiac <sup>31</sup> P-MRS | 27 patients with HF and 24 healthy subjects                                                                                                                                                                                                                         | The concentrations of PCr and ATP and the CK rate-constant kf were reduced in HF patients by 13–19%. CK flux was reduced by 32%. CK flux was correlated with energy utilization and reduced cardiac mechanical work.                                                                                                                   |
| Solaiyappan et al. <sup>32</sup> | Cardiac <sup>31</sup> P-MRS | 45 healthy subjects and 109 patients with non-ischaemic cardiomyopathy. Of the 109 patients some had LVH with no evidence of critical coronary disease, 38 patients were diagnosed with HCM.                                                                        | Neural networks employing <sup>31</sup> P-MRS measures (ATP, PCr, the first order CK reaction rate kf, CK flux) had an accuracy of 84% in discriminating healthy, HF and non-HF cardiac disease. The neural network also distinguished HF patients with DCM, hypertrophy, and NYHA class with around 80% accuracy.                     |
| Burrage et al. <sup>33</sup>     | Cardiac <sup>31</sup> P-MRS | Patients across the spectrum of diastolic dysfunction and HFpEF (9 with T2D, 14 with HFpEF; and 9 with cardiac amyloidosis) and 11 healthy controls                                                                                                                 | Reduced PCr/ATP ratio existed across the spectrum of HFpEF, and it was correlated with disease severity including NYHA class, NT-proBNP, and echocardiographic E/e' ratio.                                                                                                                                                             |
| Rayner et al. <sup>34</sup>      | Cardiac <sup>31</sup> P-MRS | 16 patients with normal weight and DCM (DCM <sub>NW</sub> ), 27 with obesity and DCM (DCM <sub>OB</sub> ), and 26 normal weight controls (CTL <sub>NW</sub> )<br>19 DCM <sub>OB</sub> patients underwent repeat assessment after a dietary weight loss intervention | Myocardial PCr/ATP was reduced in DCM. Weight loss intervention prevented fall in PCr/ATP ratio and increased median CK flux during dobutamine stress test.                                                                                                                                                                            |
| Nakae et al. <sup>35</sup>       | Cardiac <sup>1</sup> H-MRS  | Patients with either DCM (11) or HCM (7) and healthy controls (14)                                                                                                                                                                                                  | Myocardial creatine was lower in both patients with DCM ( $16.1 \pm 4.5$ ) and HCM ( $22.6 \pm 8.1$ $\mu\text{mol/g}$ ) compared to healthy hearts ( $27.6 \pm 4.1$ $\mu\text{mol/g}$ ).<br>Myocardial creatine correlated positively with LVEF and negatively with plasma BNP.                                                        |
| Nakae et al. <sup>36</sup>       | Cardiac <sup>1</sup> H-MRS  | 15 patients with CHF and 14 healthy controls                                                                                                                                                                                                                        | Myocardial creatine was significantly lower in failing hearts than in healthy hearts ( $15.1 \pm 5.0$ vs. $27.6 \pm 4.1$ $\mu\text{mol/g}$ ), correlated negatively with plasma BNP.                                                                                                                                                   |
| Nakae et al. <sup>37</sup>       | Cardiac <sup>1</sup> H-MRS  | 14 patients (2 with cardiac amyloidosis, 4 with HHD, 2 with valvular heart disease, 2 with HCM, 2 with DCM, 1 with restrictive cardiomyopathy and 1 with post-operative atrial septal defect) and 10 healthy controls                                               | Myocardial creatine levels in diseased hearts were significantly lower than healthy hearts ( $16.5 \pm 6.0$ vs $27.1 \pm 3.2$ $\mu\text{mol/g}$ ) and was positively correlated with LVEF. Myocardial creatine content in patients who were hospitalized due to HF within 1 year was significantly lower than those in other patients. |
| Nakae et al. <sup>38</sup>       | Cardiac <sup>1</sup> H-MRS  | 8 patients with HCM, 12 with DCM, 10 with ischaemic cardiomyopathy, and 22 healthy subjects                                                                                                                                                                         | Myocardial triglyceride was lower in HCM and higher in ischaemic cardiomyopathy, while there was no difference between DCM and healthy hearts.<br>Myocardial creatine was lower in HCM, DCM and ischaemic cardiomyopathy, and it was correlated with LVEF and FA uptake.                                                               |
| Liao et al. <sup>39</sup>        | Cardiac <sup>1</sup> H-MRS  | 50 AHF patients and 21 healthy controls                                                                                                                                                                                                                             | Patients who were discharged after hospitalization for AHF (with low EF and normal EF) had increased myocardial UFA content than controls (0.79% vs. 0.21% vs. 0.14%, respectively).                                                                                                                                                   |
| Zamani et al. <sup>40</sup>      | Leg creatine CEST           | 19 patients with hypertension, 20 with HFpEF, and 20 healthy controls                                                                                                                                                                                               | Impaired skeletal muscle oxidative phosphorylation capacity was found in patients with HFpEF, evidenced by longer half-time of creatine recovery.                                                                                                                                                                                      |

CAD, coronary artery disease; HHD, hypertensive heart disease.

development as well as targets for future therapies. Despite this recognition, cardiac metabolism is not routinely assessed in clinical practice. At present, magnetic resonance (MR) metabolic imaging uses techniques including MR spectroscopy (MRS), hyperpolarized MRS, and chemical exchange saturation transfer (CEST) imaging to visualize and quantify metabolites (*Graphical abstract*). Unlike metabolic imaging using positron emission tomography (PET) that requires radioactive tracers and PET does not distinguish injected tracer from its metabolic products, MRI metabolic imaging allows for in vivo assessment of many aspects of cardiac metabolism in the normal and diseased heart that may lead to better characterization, prevention, and treatment of HF. In *Table 1*, we summarize clinical studies using cardiac metabolic MRI to image myocardial metabolism in a dedicated HF setting. For more detailed descriptions of the techniques on how to obtain the images and quantify the results, we refer the reader to the various technical reviews on this topic.<sup>41–43</sup>

## Cardiac metabolic imaging: imaging modalities

### MRS

Nuclear MRS, more commonly known as MR spectroscopy or MRS, is a non-invasive contrast-free technique, which can be used to study the presence and concentration of various metabolites in vivo in the myocardium without the use of ionizing radiation.<sup>44</sup> NMR was first described by Felix Bloch and Edward Mills Purcell in 1946. But it was not until more than two decades later that this technique was applied in cardiology field when the first <sup>31</sup>P-MRS was demonstrated in isolated heart by Oxford group (Pamela Garlick, George Radda and John Seeley) in the 1970s.<sup>45</sup> MRS is a spectroscopic technique that observes the effect of intramolecular magnetic fields on the nuclei of interest when placed in a magnetic field and probed with radio frequency pulses. These intramolecular magnetic fields induce different shifts in resonant frequencies (or 'chemical shifts') dependent on the molecular electronic structure and functional groups and are often uniquely characteristic of individual molecules of interest.<sup>44</sup> Generally, these molecules of interest from the heart are referred to as 'metabolites' and typically each metabolite will exhibit a unique chemical shift that can change as the metabolite metabolizes to another downstream metabolite. Furthermore, cardiac MRS can be acquired from a range of different nuclei, including <sup>31</sup>Phosphorus (<sup>31</sup>P) and <sup>1</sup>Proton (<sup>1</sup>H), in which each of these nuclei can be used to assess different aspects of cardiac metabolism.

MRS has been mostly applied clinically for brain tissue, some of which have been implemented in clinical practice (i.e. to identify primary brain tumours, tumour aggressiveness, and evaluate after treatment).<sup>46</sup> Currently, cardiac MRS is not widely performed in routine clinical examinations due to various technical challenges including but not limited to limited clinically available field strengths, susceptibility to field inhomogeneity, non-standardization of post processing of spectra, and lack of infrastructure for non-proton metabolites. Most clinical cardiac studies typically are performed at 1.5 T or 3.0 T and thus a majority of cardiac MRS studies are performed at these field strengths.<sup>14,19,24,33</sup> Generally, increasing the field strength improves signal-to-noise ratio (SNR) and the metabolite peaks separation, and thus, MRS could potentially improve at higher field strengths

(e.g. 7 T) with a few studies demonstrating improved sensitivity to high energy phosphates.<sup>47,48</sup> Higher field strengths unfortunately incur increased field inhomogeneity, which can introduce artefacts and remain an active area of research. Post processing to effectively separate, identify, and quantify the metabolite peaks are not completely standardized and require local technical expertise to ensure quality assurance of data.<sup>49,50</sup> This fragmentation is a consequence of the vibrant MRS research community but has led to challenges in standardizing measurements and reported values. Finally, it should be noticed that, if MRS is used to observe non-proton nuclei, then additional hardware including nucleus-specific coils and radiofrequency (RF) power amplification are also required adding to the complexity and cost of performing such studies.<sup>44,51</sup> These hardware requirements are significant infrastructural challenges and again are not standardized in routine clinical environments.

In general, conventional <sup>1</sup>H-MRI is first acquired to confirm and guide the appropriate anatomical voxel selection and surface coil placement for spectroscopic interrogation. The nuclei-specific coils and RF for cardiac MRS examinations should be placed appropriately to minimize the distance between the heart and the coil and the effects of respiratory motion. MR spectra can be spatially localized with several sequences such as depth-resolved surface coil spectroscopy, image-selected in vivo spectroscopy, or chemical shift imaging.<sup>44,52</sup> Furthermore, synchronization with cardiac-induced motion using cardiac gating technique is required.<sup>53,54</sup> There are several ways to quantify metabolite concentrations from MRS, including absolute quantification using internal (i.e. <sup>1</sup>H-MRS-measured tissue water as a reference standard) and external references (e.g. phantoms), and relative methods using metabolite ratios (e.g. PCr/ATP ratio).<sup>55</sup>

### <sup>31</sup>P spectroscopy

Within the heart, the most abundant phosphorous-containing metabolites are ATP, adenosine diphosphate (ADP), adenosine monophosphate, PCr, inorganic phosphate (Pi), 2,3-diphosphoglycerate, and phosphodiester. <sup>31</sup>P-MRS is frequently used to determine the PCr/ATP ratio, which is used as a marker for cardiac energy metabolism in the literature (*Figure 1*). Intracellular pH can also be quantified by means of comparing the chemical shift between the Pi and PCr resonances.<sup>56</sup> Furthermore, <sup>31</sup>P-MRS and magnetization transfer techniques can be utilized to measure *in vivo* metabolic fluxes via CK and ATP synthase.<sup>57</sup> Other than the readouts mentioned above, the Gibbs free energy can also be estimated by measuring total creatine combined with <sup>31</sup>P-MRS readouts.<sup>58</sup>

Preclinical and clinical studies have firmly recognized perturbed energy metabolism as a hallmark of the failing heart. Imaging of cardiac energetics using <sup>31</sup>P-MRS has been investigated in preclinical animal models and humans with HF. Studies in a mouse model of pressure-overload showed that hypertrophic hearts had 25% lower PCr/ATP ratio compared to controls.<sup>59,60</sup> In another study, myocardial creatine phosphate in a rat model of triiodothyronine and isoproterenol-induced cardiac hypertrophy was reduced by 45% and 25% respectively.<sup>61</sup> Reduction of PCr/ATP ratio was also observed in a swine model of pacing-induced dilated cardiomyopathy (DCM).<sup>62</sup>

One of the earliest studies by Neubauer *et al.*<sup>14</sup> showed that cardiac energy phosphate metabolism was normal in patients with left anterior ascending artery (LAD) stenosis and chronic myocardial infarction (MI) without HF, and that it was correlated with HF severity

in DCM. Moreover, reduction of PCr/ATP ratio in DCM was correlated with the New York Heart Association (NYHA) class<sup>14</sup> and with left ventricular ejection fraction (LVEF), suggesting that PCr/ATP ratio decrease in advanced HF but initially remains normal.<sup>16</sup> In agreement, previous studies demonstrated that reduction of PCr/ATP ratio was also observed in patients with DCM<sup>20,22,30</sup> and hypertrophic cardiomyopathy (HCM).<sup>24,28</sup> In a recent study, Burrage et al.<sup>33</sup> reported decreased PCr/ATP ratio in patients across the spectrum of diastolic dysfunction and HF with preserved ejection fraction (HFpEF), and the energy deficit severity was correlated with NYHA class, NT-proBNP and echocardiographic E/e' ratio.

Some studies also used <sup>31</sup>P-MRS to monitor the effects of pharmacological and non-pharmacological intervention on cardiac energetics. For example, treatment with ACE inhibitors, digitalis, diuretics and beta-blockers for 3 months improved PCr/ATP ratio in DCM patients.<sup>14</sup> Hirsch et al reported that a xanthine oxidase inhibitor allopurinol increased PCr/ATP ratio, PCr concentration, and CK flux in HF patients.<sup>25</sup> In patients with non-ischaemic chronic HF, perhexiline normalized skeletal muscle PCr recovery after exercise<sup>21</sup> and increased myocardial PCr/ATP ratio by 30%<sup>27</sup>. Interestingly, dietary weight loss intervention was also reported to improve myocardial energetics in patients with DCM and obesity.<sup>34</sup>

Additionally, PCr/ATP ratio may also provide additional prognostic information on survival of patients with HF. In patients with DCM, myocardial PCr/ATP more accurately helped predict long-term survival than NYHA class or LVEF.<sup>16</sup> In a prospective study following 58 patients with nonischaemic cardiomyopathy for a median of 4.7 years, Bottomley et al.<sup>26</sup> demonstrated that even after correction for NYHA class, LVEF, and race, CK flux was a significant predictor of HF outcomes. Furthermore, risk of HF-related composite outcomes decreased by 32–39% for every 1  $\mu\text{mol g}^{-1} \text{s}^{-1}$  increase in CK flux.

Of note, data from experimental study demonstrated that both PCr and ATP levels decrease in parallel in HF<sup>63</sup>; therefore, the changes in cardiac energetics in HF is often underestimated when PCr/ATP ratio is used rather than measurement of absolute PCr and ATP concentrations, especially during the early stage of HF development. However, measurement of the absolute concentrations of PCr and ATP *in vivo* using <sup>31</sup>P-MRS is more challenging as it requires (external) concentration reference (e.g. myocardial tissue from biopsy, phantom) and acquisition adjustments (e.g. sensitivity profile of the radio-frequency coil). Reduced PCr levels without change in ATP were observed in patients with cardiac hypertrophy and normal cardiac function,<sup>23</sup> while in patients with DCM, both PCr and ATP were reduced but the reduction of PCr was more severe.<sup>17,18</sup> In DCM, Beer et al also showed that PCr levels were decreased by 51% while ATP levels by 35%, and the PCr/ATP ratio was reduced by 25% only.<sup>18</sup> A significant correlation was also found between LV volume/EF and cardiac energetics, with the strongest correlation observed for PCr and the weakest correlation observed for PCr/ATP ratio.<sup>18</sup> Recent study using combination of cardiac pressure-volume loops, MRI, and <sup>31</sup>P-MRS showed connection between reduced cardiac mechanical work with reduced CK flux in patients with HF.<sup>31</sup> Additionally, neural network analysis employing <sup>31</sup>P-MRS readouts were able to distinguish HF and NYHA class with clinically relevant accuracy.<sup>32</sup>

Other than indices described above, <sup>31</sup>P-MRS can also be used to determine the changes in the kinetic of CK shuttle, sensitive marker of

myocardial energetics. Significant reductions in myocardial CK pseudo first-order rate (CK  $k_i$ ) were observed in patients with HF compared to healthy subjects.<sup>23,29,64</sup> Recently, a new method combining a shorter 'stressed saturation transfer' extension to the triple repetition time saturation transfer method has been introduced at 3T that enabled the quantification of myocardial CK  $k_i$  in the supine position.<sup>65</sup>

#### Advantages and limitations

Unlike conventional biochemical analysis which requires tissue biopsy, <sup>31</sup>P-MRS can provide cardiac energetics readouts and metabolic fluxes noninvasively. Notably, longitudinal study with repeated measurements of high-energy phosphates can be measured on the same animal or subjects; something that cannot be done by biochemical means. However, <sup>31</sup>P-MRS does not provide information about the rate of ATP production and/or of ATP utilization. Also, <sup>31</sup>P-MRS has inherently lower sensitivity compared to proton and limited spatial resolution. To overcome these limitations, recent technical advancements such as spatial localization with optimal point-spread function<sup>66</sup> can be employed and acquiring at ultra-high-field strength ( $\geq 7$  T) will increase the MRS sensitivity, improve SNR and shorter measurement time.<sup>47</sup>

#### <sup>1</sup>H spectroscopy

Protons (<sup>1</sup>H) have the highest sensitivity and natural abundance of all nuclei, and hence, endogenous protons produce large MR signal. <sup>1</sup>H is found in many metabolites including creatine, lactate, carnitine, taurine, and lipids. *In vivo* cardiac <sup>1</sup>H-MRS has been studied to quantify myocardial triglyceride content in both healthy<sup>67,68</sup> and diseased hearts.<sup>35,36</sup> Using <sup>1</sup>H-MRS, the chemical composition of the fat can be determined by measuring the relative amplitudes of the peaks in the fat spectrum that correspond to different positions within the triglyceride molecule (based on amount of the methyl and methylene resonances), although contribution from other lipids such as cellular phospholipids as well as other FA-containing lipid cannot be excluded.<sup>69,70</sup> Besides quantification of myocardial fat content, <sup>1</sup>H-MRS has the potential to measure total creatine concentrations (i.e. both PCr and free creatine) (Figure 2). Free creatine concentration can also be calculated by measuring total creatine concentration *in vivo* using <sup>1</sup>H-MRS and subtracting the PCr concentration determined with <sup>31</sup>P-MRS<sup>71</sup>; thus, the Gibbs free energy ( $\Delta G$ ) can then be estimated using the ADP, ATP, and Pi concentrations.<sup>19</sup> Single-voxel or spectroscopic imaging sequences, such as stimulated echo acquisition mode,<sup>72</sup> point resolved spectroscopy,<sup>19</sup> spin-echo full-intensity acquired localized spectroscopy,<sup>73</sup> or (semi-) localization by adiabatic selective refocusing (semi-LASER and LASER),<sup>74,75</sup> can be used for <sup>1</sup>H-MRS.

Until now, there are only few studies assessing myocardial lipid metabolism and creatine using <sup>1</sup>H-MRS in cardiomyopathy and HF. Myocardial triglyceride content has been reported to predict diastolic dysfunction in diabetes<sup>76</sup> and aging male heart.<sup>77</sup> Myocardial triglyceride was significantly lower in HCM and higher in ischaemic cardiomyopathy, while there was no difference between DCM and healthy hearts.<sup>38</sup> Interestingly, Nakae et al.<sup>38</sup> also suggested that myocardial triglycerides content did not correlate with cardiac dysfunction. Reduced myocardial unsaturated FA was also reported in

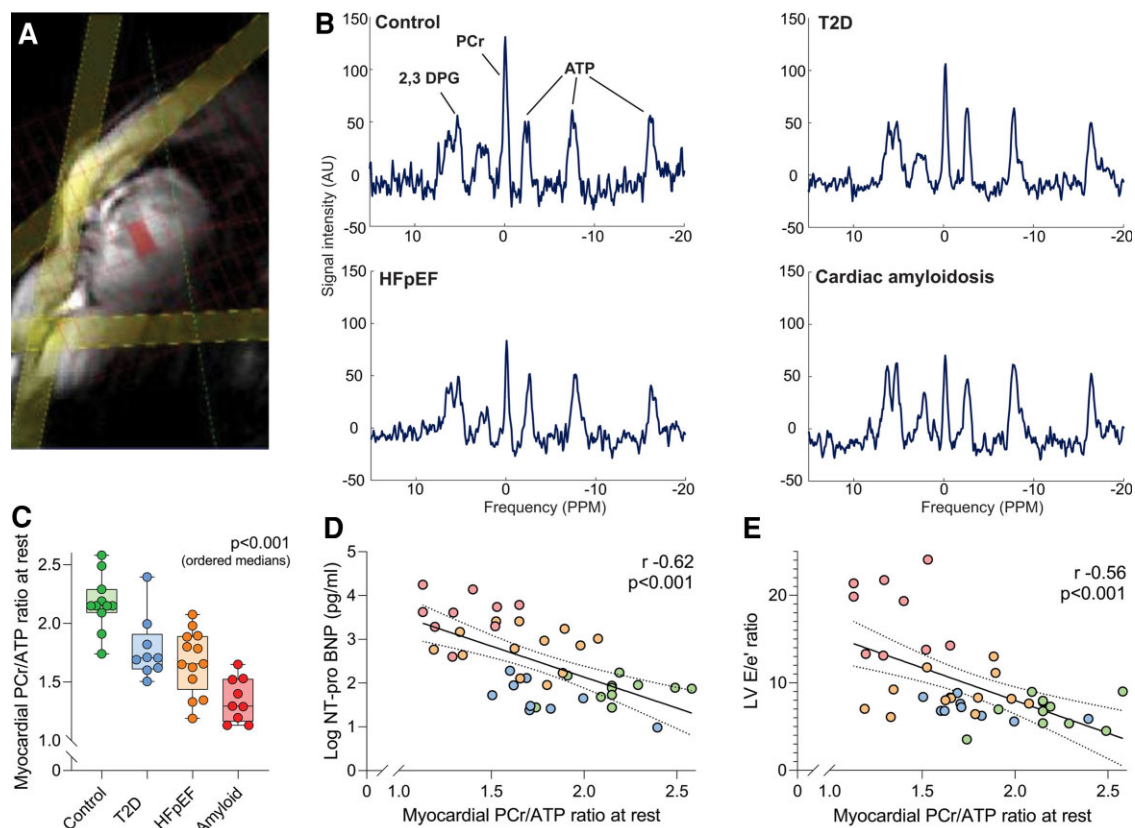

**Figure 1** (A) Representative  $^{31}\text{P}$ -MRS acquisition strategy with a voxel placed in the midventricular septum (red) and saturation bands (yellow) placed over skeletal muscle and the liver. (B) Representative cardiac  $^{31}\text{P}$ -MR spectra of healthy control, patients with type 2 diabetes (T2D), HFpEF, and cardiac amyloidosis. (C) Myocardial PCr/ATP ratio of all groups. Associations of PCr/ATP ratio with (D) NT-proBNP and (E) LV E/e' ratio. Adapted from <sup>33</sup> with permission.

patients who were discharged after hospitalization for acute HF (AHF).<sup>39</sup>

In a series of elegant studies, Nakae *et al.*<sup>35–38</sup> showed that patients with non-ischaemic HF (secondary to DCM, HCM, restrictive cardiomyopathy, valvular heart disease, hypertensive heart disease or cardiac amyloidosis) had reduced myocardial total creatine content. Myocardial creatine content was correlated positively with LVEF<sup>35,37,38</sup> and FA uptake<sup>38</sup> and negatively with plasma BNP.<sup>35,36</sup> Using  $^1\text{H}$ -MRS and  $^{31}\text{P}$ -MRS, Hirsch *et al.*<sup>25</sup> demonstrated that allopurinol reduced concentration of ADP and increased  $\Delta G_{\text{ATP}}$  in patients with HF. Furthermore, myocardial creatine content in patients who were hospitalized due to HF within 1 year were significantly lower than those in other patients, suggesting that it may be correlated with the degree of myocardial cellular damage in the diseased heart.<sup>37</sup>

#### Advantages and limitations

$^1\text{H}$ -MRS can determine myocardial lipid and creatinine contents without invasive biopsy, allowing for repeated measurements in longitudinal studies. Cardiac  $^1\text{H}$ -MRS requires the same hardware (i.e. magnet, gradient, and RF coils) as any cardiac MRI protocol. Major challenges for  $^1\text{H}$ -MRS include the necessity for excellent suppression of the strong  $^1\text{H}$  signal from water, excellent shimming, and

motion compensation.  $^1\text{H}$ -MRS often requires larger voxel sizes and longer scan times that limit its clinical use. To overcome this, fast spectroscopic imaging of both cardiac triglyceride and total creatine content using optimized echo-planar spectroscopic imaging sequence has been introduced but continue to be an active area of research.<sup>78</sup> Also, other limitations that need to be considered are the physiological factors such as nutritional status (feeding or fasting state) and exercise that may influence the lipid content abundance, making it very difficult to compare across these variables.<sup>79–81</sup>

#### Hyperpolarized $^{13}\text{C}$ spectroscopy

Tracing of carbon atoms through multiple metabolic pathways is an invaluable tool for investigating dynamic metabolic changes occurring in health and disease. Conventional method to trace carbon *in vivo* utilizes MRS of stable isotope  $^{13}\text{C}$ , following injection of  $\sim 100\%$   $^{13}\text{C}$ -enriched metabolites such as  $^{13}\text{C}$ -glucose to overcome the low natural abundance of  $^{13}\text{C}$  (1.1%). The  $^{13}\text{C}$  labels are transferred to downstream metabolites through enzymatic reactions *in vivo*, resulting in multiple peaks in the  $^{13}\text{C}$  spectrum, allowing quantitative analysis of metabolic flux in organ.<sup>82,83</sup> However, due to the low NMR sensitivity of  $^{13}\text{C}$  ( $\sim 1.6\%$  that of  $^1\text{H}$ ), the conventional  $^{13}\text{C}$ -MRS requires long scan time and suffers from poor spatial and temporal resolutions. To overcome these limitations,

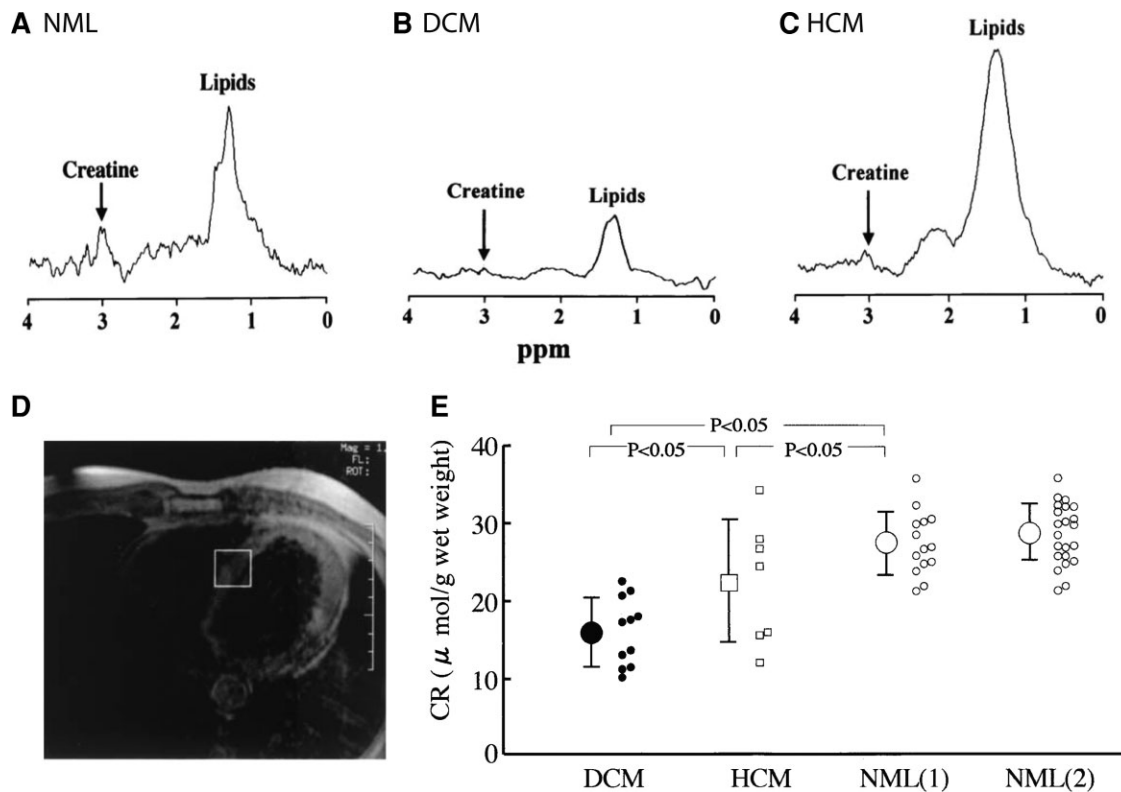

**Figure 2** Representative cardiac <sup>1</sup>H-MR spectra of (A) a healthy control, patient with (B) DCM and (C) HCM. (D) Representative spin-echo MRI. (E) Myocardial creatine content of all groups. NML, normal/healthy controls; NML(1), age-matched normal control group; NML(2), non-age-matched larger normal control group; CR, creatine. Modified from <sup>35</sup>, with permission.

hyperpolarization was introduced to dramatically increase the spin alignment (or polarization) of exogenous <sup>13</sup>C-enriched substrates, yielding a signal enhancement of more than 10 000-fold,<sup>84</sup> *in vivo* after injection of the substrate, allowing for rapid assessment of <sup>13</sup>C metabolism *in vivo*.<sup>42,83</sup>

Hyperpolarization MRS is an emerging technology that requires specialized hardware to improve polarization by either dynamic nuclear polarization (DNP)<sup>84</sup> or parahydrogen-induced polarization (PHIP).<sup>85</sup> DNP is the most common form of hyperpolarized MRS, currently employed in more than 30 clinical trials, and yields high polarization levels by rapidly cooling down a molecule of interest to near 1 Kelvin in a high magnetic field (3 T to 10 T) and irradiating electron spins by microwave to dynamically transfer electron polarization to nuclear spin.<sup>84</sup> PHIP generates spin polarization by transferring parahydrogen to the target molecule through a chemical reaction of breaking a double bond. For most cardiac metabolic imaging applications, hyperpolarized <sup>13</sup>C-MRS is achieved via DNP given its flexibility in the molecule of interest which is not restricted to the double bond requirement of PHIP.<sup>85</sup>

Hyperpolarized <sup>13</sup>C-MRS via DNP requires rapid dissolution of the frozen, hyperpolarized <sup>13</sup>C substrate by heated solvent within 1–2 s to retain the high-degree polarization and neutralize pH in the injectable solution. The lifetime of the dissolved hyperpolarized <sup>13</sup>C substrate is limited by the <sup>13</sup>C T<sub>1</sub> relaxation rate, which ranges from 1–3 min<sup>-1</sup>. To benefit from a hyperpolarized liquid state

solution, rapid transfer (through injection) into the subject is required, followed by efficient and rapid <sup>13</sup>C spectroscopic imaging sequences.<sup>44,83</sup> Myocardial substrate utilization, citric acid cycle flux, pyruvate dehydrogenase flux, beta-oxidation of FA can then be quantified.<sup>83</sup>

For cardiac <sup>13</sup>C-MRS study, the heart must be supplied with labeled compounds such as pyruvate ([1-<sup>13</sup>C]pyruvate to quantify pyruvate dehydrogenase flux or [2-<sup>13</sup>C]pyruvate to allow investigation of Krebs cycle metabolism),<sup>86</sup> butyrate (FA metabolism),<sup>87</sup> or acetoacetate and beta-hydroxybutyrate (ketone body metabolism).<sup>88</sup> These enable investigation of cardiac FA, glucose, and ketone body metabolism, which may well be perturbed in HF.

Cardiac hyperpolarized <sup>13</sup>C-MRS has been studied in various pre-clinical model of HF. Experimental study in rats with cardiac hypertrophy (through abdominal aortic banding) resulted in unchanged PDH flux but increased lactate production, suggesting of enhanced glycolysis.<sup>89</sup> In a rat model of diabetic cardiomyopathy, PDH flux was reduced and treatment with PDK inhibitor dichloroacetate could normalize this level,<sup>90</sup> while in rats with doxorubicin-induced cardiomyopathy, both PDH flux and Krebs cycle flux were decreased.<sup>91</sup> Intriguingly, study in mice carrying *Lmna*<sup>H222P/H222P</sup> mutation (a model for DCM) demonstrated that metabolic dysfunction, marked by reduced pyruvate/lactate exchange rate, was detected well before the disease can be detected by echocardiography.<sup>92</sup> Labelling both pyruvate and acetoacetate, a study in obese rats





fundamentally low signal-to-noise (SNR) spectral data and motion correction, and sensitivity to field inhomogeneity. For probing nuclei beyond proton, two key hardware components are needed to realize a MRS acquisition including specialized coils tuned to the frequency of the nuclei of interest and broad band RF power amplifier. Typically, multi-nuclei MR machine and the latter hardware component are quite costly. SNR of MRS spectra relies on the concentration of the nuclei of interest, which for metabolites (~50 mM) is typically 1000x less than water (~55 M).<sup>44,70</sup> Thus, SNR of MRS is much less compared to conventional MRI resulting in lower resolution (~cm) or even single voxel acquisition and dramatically increased scan time (>10 min) due to the need of signal averaging. Motion correction of both cardiac and respiratory motion is ideally needed to avoid partial voluming with the blood pool but given the low spatial resolution (typically large single voxel acquisition) and long scan times, free breathing acquisition is pragmatically employed. MRS is extremely sensitive to magnetic field ( $B_0$ ) inhomogeneity, which is a common challenge for imaging in the thoracic region.  $B_0$  shimming is requirement for successful MRS and typically necessitates a separate pre-scan of the thoracic cavity and real-time manual calibration of the scanner before each acquisition. In addition, an important consideration for clinical application of hyperpolarized  $^{13}\text{C}$  is cost. Clinical polarizer costs almost similar to that of a PET cyclotron and given the cost, clinical usage hyperpolarized  $^{13}\text{C}$  is more likely be limited to large academic medical institution.<sup>82</sup>

For CEST, the main clinical barriers are mostly related to prolonged scan times, motion correction, and field inhomogeneity. Because CEST requires multiple measurements at varying chemical shift offsets to reconstruct a z-spectra, it is not possible to acquire under single breath-hold acquisition like conventional parametric mapping. For a single slice, acquisition can vary from 5 min<sup>99</sup> to 30 min<sup>98</sup> depending on how sensitive the CEST technique is the metabolite of interest. Thus, free breathing techniques are required that further the complexity in dealing with motion correction of both respiratory and cardiac motion. Lastly, CEST is sensitive to  $B_0$  and radio frequency field ( $B_1$ ) inhomogeneity and requires both  $B_0$  shimming and  $B_1$  correction. Consequentially, this can complicate the exam with the need of pre-scans and could significantly prolong scan time further.

The translation to clinical practice will require training for staff members, a dedicated team of basic MR scientists, MR technologist, nurse, and clinicians (radiologist, cardiologist) are typically involved to perform cardiac metabolic MRI.

## Concluding remarks and future perspectives

To date, the use of cardiac metabolic MRI (MRS, hyperpolarized MRS and CEST) has been largely limited to research settings (in a single-centre observational study with relatively small study population) and is not routinely used in clinical practice or in multi-centre clinical trials. Nevertheless, the mounting use of CMR in providing a comprehensive assessment of myocardial metabolism in HF is encouraging. Now, the next question that may come in mind is: 'how far have we come? are we any closer to use it in clinical practice?' Unfortunately, the answer is 'we have come far, but we are not quite

there yet'. Fortunately, technology for investigation of cardiac metabolism *in vivo* using cardiac metabolic MRI has evolved, and new MR data acquisition sequences and improved MRI hardware have been developed. Despite the technical feasibility and many advantages of cardiac metabolic MRI, their clinical applications are still in their infancy. Currently, there are several areas that need to be improved to make cardiac metabolic MRI become mainstream procedure in clinical practice.

First, the exact mechanisms linking cardiac metabolic changes to HF development and/or progression are not well understood. Also, there is no universally accepted reference standard to image cardiac metabolism. Thus, standardized acquisition and quantification protocols will have to be implemented and agreed upon to provide clinicians with reliable measurements, which are also comparable among different centres.

Second, the quality cardiac metabolic MRI is highly operator dependent, relying on the proper acquisition and results interpretation by a team who is familiar with the techniques and limitations of cardiac metabolic MRI, making the consistency and reproducibility remain a main challenge.

Third, as the use of cardiac metabolic imaging MRI is still in research phase and has not been implemented in the clinic, often these costs are not covered by health insurance. Correspondingly, the development of new coils and additional specialized software and hardware is less prioritized by the clinical MR company as the market is currently limited to large academic medical institutions.

Nevertheless, cardiac metabolic MRI offers a powerful and versatile tool to probe different aspects of myocardial energy metabolism *in vivo* noninvasively, allowing repeated measurements from the same subjects sequentially or over time. Despite higher costs, limited availability, and the necessities for specialist expertise and dedicated setup, CMR has more advantages when evaluating patients with HF in comparison to other tools, which often require a biopsy of myocardial tissue or the use of ionizing radiation, in providing not only detailed metabolic activities but also additional fundamental information related to diagnosis, disease progression, prognosis, and response to therapy. Yet, investigation and development of the existing and new probes to address the current challenges and limitations must be continued to increase the clinical usefulness. Finally, collaborations among basic research scientist, radiologist, and clinical cardiologist, with strong partnerships between academia, funding agencies, and industry, are needed for the clinical translation from the bench to clinical implementation at the bedside. Cardiac metabolic MRI may have future value in detecting metabolic remodelling in the human heart noninvasively and will be fundamental to the development of drugs aimed at cardiac metabolism in HF.

**Conflict of interest:** Y.Y. is supported by grant from National Institute of Health (1R21JM137227). C.T.N. is supported by grants from National Institute of Health (R01 HL151704, R01 HL159010, R01 HL135242). W.H.W.T. is a consultant for Sequana Medical A.G., Cardiol Therapeutics Inc, and Genomics plc and has received honorarium from Springer Nature for authorship/editorship and American Board of Internal Medicine for exam writing committee participation, all unrelated to the contents of this paper. All other authors have reported that they have no relationships relevant to the contents of this

paper to disclose. We apologize to all authors whose relevant work could not be cited due to space limitations.

## References

- Kolwicz SC, Purohit S, Tian R. Cardiac metabolism and its interactions with contraction, growth, and survival of cardiomyocytes. *Circ Res* 2013;**113**:603–616.
- Lopaschuk GD, Karwi QG, Tian R, Wende AR, Abel ED. Cardiac energy metabolism in heart failure. *Circ Res* 2021; **128**.
- Neubauer S. The failing heart—an engine out of fuel. *N Engl J Med* 2007;**356**:1140–1151.
- Murashige D, Jang C, Neinast M, Edwards JJ, Cowan A, Hyman MC, et al. Comprehensive quantification of fuel use by the failing and nonfailing human heart. *Science (80-)* 2020;**370**:364–368.
- Yurista SR, Chong C-R, Badimon JJ, Kelly DP, de Boer RA, Westenbrink BD. Therapeutic potential of ketone bodies for patients with cardiovascular disease. *J Am Coll Cardiol* 2021;**77**:1660–1669.
- Bittl JA, Ingwall JS. Reaction rates of creatine kinase and ATP synthesis in the isolated rat heart. A 31P NMR magnetization transfer study. *J Biol Chem* 1985;**260**:3512–3517.
- Nascimben L, Ingwall JS, Pauletto P, Friedrich J, Gwathmey JK, Saks V, et al. Creatine kinase system in failing and nonfailing human myocardium. *Circulation* 1996;**94**:1894–1901.
- Yurista SR, Nguyen CT, Rosenzweig T, de Boer RA, Westenbrink BD, Rosenzweig A, et al. Ketone bodies for the failing heart: fuels that can fix the engine? *Trends Endocrinol Metab* 2021. **In press**.
- Ingwall JS, Atkinson DE, Clarke K, Fetters JK. Energetic correlates of cardiac failure: changes in the creatine kinase system in the failing myocardium. *Eur Heart J* 1990; **11**:108–115.
- Bedi KC, Snyder NW, Brandimarto J, Aziz M, Mesaros C, Worth AJ, et al. Evidence for intramyocardial disruption of lipid metabolism and increased myocardial ketone utilization in advanced human heart failure. *Circulation* 2016;**133**:706–716.
- Yurista SR, Chen S, Welsh A, Tang WHW, Nguyen CT. Targeting Myocardial Substrate Metabolism in the Failing Heart: Ready for Prime Time? *Curr Heart Fail Rep* 2022. doi:10.1007/s11897-022-00554-1.
- Yurista SR, Matsuura TR, Silljé HHW, Nijholt KT, McDaid KS, Shewale S V, et al. Ketone ester treatment improves cardiac function and reduces pathologic remodeling in preclinical models of heart failure. *Circ Heart Fail* 2021;**14**.
- Nielsen R, Møller N, Gørmann LC, Tolbod LP, Hansson NH, Sørensen J, et al. Cardiovascular effects of treatment with the ketone body 3-hydroxybutyrate in chronic heart failure patients. *Circulation* 2019;**139**:2129–2141.
- Neubauer S, Krahe T, Schindler R, Horn M, Hillenbrand H, Entzeroth C, et al. 31P magnetic resonance spectroscopy in dilated cardiomyopathy and coronary artery disease: altered cardiac high-energy phosphate metabolism in heart failure. *Circulation* 1992;**86**:1810–1818.
- Weiss RG, Bottomley PA, Hardy CJ, Gerstenblith G. Regional myocardial metabolism of high-energy phosphates during isometric exercise in patients with coronary artery disease. *N Engl J Med* 1990;**323**:1593–1600.
- Neubauer S, Horn M, Cramer M, Harre K, Newell JB, Peters W, et al. Myocardial phosphocreatine-to-ATP ratio is a predictor of mortality in patients with dilated cardiomyopathy. *Circulation* 1997;**96**:2190–2196.
- Okada M, Mitsunami K, Inubushi T, Kinoshita M. Influence of aging or left ventricular hypertrophy on the human heart: contents of phosphorus metabolites measured by 31P MRS. *Magn Reson Med* 1998;**39**:772–782.
- Beer M, Seyfarth T, Sandstede J, Landschütz W, Lipke C, Köstler H, et al. Absolute concentrations of high-energy phosphate metabolites in normal, hypertrophied, and failing human myocardium measured noninvasively with 31P-SLOOP magnetic resonance spectroscopy. *J Am Coll Cardiol* 2002;**40**:1267–1274.
- Weiss RG, Gerstenblith G, Bottomley PA. ATP flux through creatine kinase in the normal, stressed, and failing human heart. *Proc Natl Acad Sci* 2005;**102**:808–813.
- Hansch A, Rzanny R, Heyne J-P, Leder U, Reichenbach JR, Kaiser WA. Noninvasive measurements of cardiac high-energy phosphate metabolites in dilated cardiomyopathy by using 31P spectroscopic chemical shift imaging. *Eur Radiol* 2005;**15**:319–323.
- Lee L, Campbell R, Scheuermann-Freestone M, Taylor R, Gunaruwan P, Williams L, et al. Metabolic modulation with perhexiline in chronic heart failure. *Circulation* 2005;**112**:3280–3288.
- Chida K, Otani H, Saito H, Nagasaka T, Kagaya Y, Kohzaki M, et al. Feasibility of rapid-sequence 31 p magnetic resonance spectroscopy in cardiac patients. *Acta radiol* 2005;**46**:386–390.
- Smith CS, Bottomley PA, Schulman SP, Gerstenblith G, Weiss RG. Altered creatine kinase adenosine triphosphate kinetics in failing hypertrophied human myocardium. *Circulation* 2006;**114**:1151–1158.
- Shivu GN, Abozguia K, Phan TT, Ahmed I, Henning A, Frenneaux M. 31P magnetic resonance spectroscopy to measure in vivo cardiac energetics in normal myocardium and hypertrophic cardiomyopathy: experiences at 3 T. *Eur J Radiol* 2010;**73**:255–259.
- Hirsch GA, Bottomley PA, Gerstenblith G, Weiss RG. Allopurinol acutely increases adenosine triphosphate energy delivery in failing human hearts. *J Am Coll Cardiol* 2012;**59**:802–808.
- Bottomley PA, Panjath GS, Lai S, Hirsch GA, Wu K, Najjar SS, et al. Metabolic rates of ATP transfer through creatine kinase (CK Flux) predict clinical heart failure events and death. *Sci Transl Med* 2013;**5**.
- Beadle RM, Williams LK, Kuehl M, Bowater S, Abozguia K, Leyva F, et al. Improvement in cardiac energetics by perhexiline in heart failure due to dilated cardiomyopathy. *JACC Hear Fail* 2015;**3**:202–211.
- Dass S, Cochlin LE, Suttie JJ, Holloway CJ, Rider OJ, Carden L, et al. Exacerbation of cardiac energetic impairment during exercise in hypertrophic cardiomyopathy: a potential mechanism for diastolic dysfunction. *Eur Heart J* 2015;**36**:1547–1554.
- Schär M, Gabr RE, El-Sharkawy A-MM, Steinberg A, Bottomley PA, Weiss RG. Two repetition time saturation transfer (TWIST) with spill-over correction to measure creatine kinase reaction rates in human hearts. *J Cardiovasc Magn Reson* 2015;**17**:70.
- Stoll VM, Clarke WT, Levelt E, Liu A, Myerson SG, Robson MD, et al. Dilated cardiomyopathy: phosphorus 31 MR spectroscopy at 7 T. *Radiology* 2016;**281**:409–417.
- Gabr RE, El-Sharkawy A-MM, Schär M, Panjath GS, Gerstenblith G, Weiss RG, et al. Cardiac work is related to creatine kinase energy supply in human heart failure: a cardiovascular magnetic resonance spectroscopy study. *J Cardiovasc Magn Reson* 2018;**20**:81.
- Solaiyappan M, Weiss RG, Bottomley PA. Neural-network classification of cardiac disease from 31P cardiovascular magnetic resonance spectroscopy measures of creatine kinase energy metabolism. *J Cardiovasc Magn Reson* 2019;**21**:49.
- Burrage MK, Hundertmark M, Valković L, Watson WD, Rayner J, Sabharwal N, et al. Energetic basis for exercise-induced pulmonary congestion in heart failure with preserved ejection fraction. *Circulation* 2021;**144**:1664–1678.
- Rayner JJ, Peterzan MA, Clarke WT, Rodgers CT, Neubauer S, Rider OJ. Obesity modifies the energetic phenotype of dilated cardiomyopathy. *Eur Heart J* 2021.
- Nakae I, Mitsunami K, Omura T, Yabe T, Tsutomoto T, Matsuo S, et al. Proton magnetic resonance spectroscopy can detect creatine depletion associated with the progression of heart failure in cardiomyopathy. *J Am Coll Cardiol* 2003;**42**:1587–1593.
- Nakae I, Mitsunami K, Matsuo S, Matsumoto T, Morikawa S, Inubushi T, et al. Assessment of myocardial creatine concentration in dysfunctional human heart by proton magnetic resonance spectroscopy. *Magn Reson Med Sci* 2004;**3**:19–25.
- Nakae I, Mitsunami K, Matsuo S, Inubushi T, Morikawa S, Tsutomoto T, et al. Myocardial creatine concentration in various nonischemic heart diseases assessed by 1H magnetic resonance spectroscopy. *Circ J* 2005;**69**:711–716.
- Nakae I, Mitsunami K, Yoshino T, Omura T, Tsutomoto T, Matsumoto T, et al. Clinical features of myocardial triglyceride in different types of cardiomyopathy assessed by proton magnetic resonance spectroscopy: comparison with myocardial creatine. *J Card Fail* 2010;**16**:812–822.
- Liao P-A, Lin G, Tsai S-Y, Wang C-H, Juan Y-H, Lin Y-C, et al. Myocardial triglyceride content at 3 T cardiovascular magnetic resonance and left ventricular systolic function: a cross-sectional study in patients hospitalized with acute heart failure. *J Cardiovasc Magn Reson* 2015;**18**:9.
- Zamani P, Proto EA, Wilson N, Fazelina H, Ding H, Spruce LA, et al. Multimodality assessment of heart failure with preserved ejection fraction skeletal muscle reveals differences in the machinery of energy fuel metabolism. *ESC Hear Fail* 2021;**8**:2698–2712.
- Jones KM, Pollard AC, Pagel MD. Clinical applications of chemical exchange saturation transfer (CEST) MRI. *J Magn Reson Imaging* 2018;**47**:11–27.
- Rider OJ, Tyler DJ. Clinical implications of cardiac hyperpolarized magnetic resonance imaging. *J Cardiovasc Magn Reson* 2013;**15**:93.
- Ten HM, Neubauer S. Evaluating metabolic changes in heart disease by magnetic resonance spectroscopy. *Hear Metab* 2006;18–21.
- Hudsmith LE, Neubauer S. Magnetic resonance spectroscopy in myocardial disease. *JACC Cardiovasc Imaging* 2009;**2**:87–96.
- Garlick PB, Radda GK, Seelye PJ, Chance B. Phosphorus NMR studies on perfused heart. *Biochem Biophys Res Commun* 1977;**74**:1256–1262.
- Weinberg BD, Kuruva M, Shim H, Mullins ME. Clinical applications of magnetic resonance spectroscopy in brain tumors. *Radial Clin North Am* 2021;**59**:349–362.
- Rodgers CT, Clarke WT, Snyder C, Vaughan JT, Neubauer S, Robson MD. Human cardiac 31 P magnetic resonance spectroscopy at 7 tesla. *Magn Reson Med* 2014;**72**:304–315.

48. Ellis J, Valkovič L, Purvis LAB, Clarke WT, Rodgers CT. Reproducibility of human cardiac phosphorus MRS (31 P-MRS) at 7 T. *NMR Biomed* 2019;**32**:e4095.
49. Gajdošik M, Landheer K, Swanberg KM, Juchec C. INSPECTOR: free software for magnetic resonance spectroscopy data inspection, processing, simulation and analysis. *Sci Rep* 2021;**11**:2094.
50. Ladd ME, Bachert P, Meyerspeer M, Moser E, Nagel AM, Norris DG, et al. Pros and cons of ultra-high-field MRI/MRS for human application. *Prog Nucl Magn Reson Spectrosc* 2018;**109**:1–50.
51. Neubauer S, Rodgers CT. Cardiac magnetic resonance spectroscopy. *Cardiovascular Magnetic Resonance*. Elsevier; 2019. p97–107.e6.
52. Bottomley PA, Foster TB, Darrow RD. Depth-resolved surface-coil spectroscopy (DRESS) for in vivo 1H, 31P, and 13C NMR. *J Magn Reson* 1984;**59**:338–342.
53. Lanzer P, Barta C, Botvinick EH, Wiesendanger HU, Modin G, Higgins CB. ECG-synchronized cardiac MR imaging: method and evaluation. *Radiology* 1985;**155**:681–686.
54. Saleh MG, Edden RAE, Chang L, Ernst T. Motion correction in magnetic resonance spectroscopy. *Magn Reson Med* 2020;**84**:2312–2326.
55. Meyerspeer M, Boesch C, Cameron D, Dezortová M, Forbes SC, Heerschap A, et al. 31 P magnetic resonance spectroscopy in skeletal muscle: experts' consensus recommendations. *NMR Biomed* 2021;**34**.
56. Valkovič L, Clarke WT, Schmid AI, Raman B, Ellis J, Watkins H, et al. Measuring inorganic phosphate and intracellular pH in the healthy and hypertrophic cardiomyopathy hearts by in vivo 7 T 31P-cardiovascular magnetic resonance spectroscopy. *J Cardiovasc Magn Reson* 2019;**21**:19.
57. Schär M, El-Sharkawy A-MM, Weiss RG, Bottomley PA. Triple repetition time saturation transfer (TRiST) 31 P spectroscopy for measuring human creatine kinase reaction kinetics. *Magn Reson Med* 2010;**63**:1493–1501.
58. Weiss RG, Chatham JC, Charron MJ, Georgakopolous D, Wallimann T, Kay L, et al. An increase in the myocardial PCr/ATP ratio in GLUT4 null mice. *FASEB J* 2002;**16**:613–615.
59. Gupta A, Chacko VP, Weiss RG. Abnormal energetics and ATP depletion in pressure-overload mouse hearts: in vivo high-energy phosphate concentration measures by noninvasive magnetic resonance. *Am J Physiol Hear Circ Physiol* 2009;**297**:59–64.
60. Bakermans AJ, Abdurrachim D, van Nierop BJ, Koeman A, van der Kroon I, Baartscheer A, et al. In vivo mouse myocardial 31 P MRS using three-dimensional image-selected in vivo spectroscopy (3D ISIS): technical considerations and biochemical validations. *NMR Biomed* 2015;**28**:1218–1227.
61. Clarke K. 31P NMR spectroscopy of hypertrophied rat heart: effect of graded global ischemia. *J Mol Cell Cardiol* 1989;**21**:1315–1325.
62. Schroeder MA, Lau AZ, Chen AP, Gu Y, Nagendran J, Barry J, et al. Hyperpolarized 13 C magnetic resonance reveals early- and late-onset changes to in vivo pyruvate metabolism in the failing heart. *Eur J Heart Fail* 2013;**15**:130–140.
63. Shen W, Asai K, Uechi M, Mathier MA, Shannon RP, Vatner SF, et al. Progressive loss of myocardial ATP due to a loss of total purines during the development of heart failure in dogs. *Circulation* 1999;**100**:2113–2118.
64. Ouwerkerk R, Weiss RG, Bottomley PA. Measuring human cardiac tissue sodium concentrations using surface coils, adiabatic excitation, and twisted projection imaging with minimal T2 losses. *J Magn Reson Imaging* 2005;**21**:546–555.
65. Clarke WT, Peterzan MA, Rayner JJ, Sayeed RA, Petrou M, Krasopoulos G, et al. Localized rest and stress human cardiac creatine kinase reaction kinetics at 3 T. *NMR Biomed* 2019;**32**:e4085.
66. Löffler R, Sauter R, Kolem H, Haase A, von Kienlin M. Localized spectroscopy from anatomically matched compartments: improved sensitivity and localization for Cardiac 31P MRS in humans. *J Magn Reson* 1998;**134**:287–299.
67. Petritsch B, Gassenmaier T, Kunz AS, Donhauser J, Goltz JP, Bley TA, et al. Age dependency of myocardial triglyceride content: a 3 T High-field 1H-MR spectroscopy study. *RoFo* 2015;**187**:1016–1021.
68. Gillinder L, Goo SY, Cowin G, Strudwick M, van der Geest RJ, Wang WYS, et al. Quantification of intramyocardial metabolites by proton magnetic resonance spectroscopy. *Front Cardiovasc Med* 2015;**2**.
69. Zhou D, Guo Z. Intramyocellular lipids versus intramyocellular triglycerides. *Magn Reson Med* 2012;**67**:297–298.
70. Faller KMEE, Lygate CA, Neubauer S, Schneider JE. 1H-MR spectroscopy for analysis of cardiac lipid and creatine metabolism. *Heart Fail Rev* 2013;**18**:657–668.
71. Phillips D, ten Hove M, Schneider JE, Wu CO, Sebag-Montefiore L, Aponte AM, et al. Mice over-expressing the myocardial creatine transporter develop progressive heart failure and show decreased glycolytic capacity. *J Mol Cell Cardiol* 2010;**48**:582–590.
72. Rial B, Robson MD, Neubauer S, Schneider JE. Rapid quantification of myocardial lipid content in humans using single breath-hold 1H MRS at 3 Tesla. *Magn Reson Med* 2011;**66**:619–624.
73. Mlynárik V, Gambarota G, Frenkel H, Gruetter R. Localized short-echo-time proton MR spectroscopy with full signal-intensity acquisition. *Magn Reson Med* 2006;**56**:965–970.
74. Sourdon J, Roussel T, Costes C, Viout P, Guye M, Ranjeva JP, et al. Comparison of single-voxel 1H-cardiovascular magnetic resonance spectroscopy techniques for in vivo measurement of myocardial creatine and triglycerides at 3 T. *J Cardiovasc Magn Reson* 2021;**23**:1–13.
75. Öz G, Deelchand DK, Wijnen JP, Mlynárik V, Xin L, Mekle R, et al. Advanced single voxel 1 H magnetic resonance spectroscopy techniques in humans: experts' consensus recommendations. *NMR Biomed* 2021;**34**.
76. Rijzewijk LJ, van der Meer RW, Smit JWA, Diamant M, Bax JJ, Hammer S, et al. Myocardial steatosis is an independent predictor of diastolic dysfunction in type 2 diabetes mellitus. *J Am Coll Cardiol* 2008;**52**:1793–1799.
77. van der Meer RW, Rijzewijk LJ, Diamant M, Hammer S, Schar M, Bax JJ, et al. The ageing male heart: myocardial triglyceride content as independent predictor of diastolic function. *Eur Heart J* 2008;**29**:1516–1522.
78. Weiss K, Martini N, Boesiger P, Kozerke S. Metabolic MR imaging of regional triglyceride and creatine content in the human heart. *Magn Reson Med* 2012;**68**:1696–1704.
79. Reingold JS, McGavock JM, Kaka S, Tillery T, Victor RG, Szczepaniak LS. Determination of triglyceride in the human myocardium by magnetic resonance spectroscopy: reproducibility and sensitivity of the method. *Am J Physiol Metab* 2005;**289**:E935–E939.
80. van der Meer RW, Hammer S, Smit JWA, Frölich M, Bax JJ, Diamant M, et al. Short-term caloric restriction induces accumulation of myocardial triglycerides and decreases left ventricular diastolic function in healthy subjects. *Diabetes* 2007;**56**:2849–2853.
81. Bilet L, Weijs T, Hesselink MKC, Glatz JFC, Lamb HJ, Wildberger J, et al. Exercise-induced modulation of cardiac lipid content in healthy lean young men. *Basic Res Cardiol* 2011;**106**:307–315.
82. Wang ZJ, Ohliger MA, Larson PEZ, Gordon JW, Bok RA, Slater J, et al. Hyperpolarized 13C MRI: state of the art and future directions. *Radiology* 2019;**291**:273–284.
83. Schroeder MA, Clarke K, Neubauer S, Tyler DJ. Hyperpolarized magnetic resonance. *Circulation* 2011;**124**:1580–1594.
84. Ardenkjaer-Larsen JH, Fridlund B, Gram A, Hansson G, Hansson L, Lerche MH, et al. Increase in signal-to-noise ratio of > 10,000 times in liquid-state NMR. *Proc Natl Acad Sci* 2003;**100**:10158–10163.
85. Adams RW, Aguilar JA, Atkinson KD, Cowley MJ, Elliott PIP, Duckett SB, et al. Reversible interactions with para-hydrogen enhance NMR sensitivity by polarization transfer. *Science* (80-) 2009;**323**:1708–1711.
86. Apps A, Lau J, Peterzan M, Neubauer S, Tyler D, Rider O. Hyperpolarised magnetic resonance for in vivo real-time metabolic imaging. *Heart* 2018;**104**:1484–1491.
87. Ball DR, Rowlands B, Dodd MS, Le PL, Ball V, Carr CA, et al. Hyperpolarized butyrate: a metabolic probe of short chain fatty acid metabolism in the heart. *Magn Reson Med* 2014;**71**:1663–1669.
88. Abdurrachim D, Woo CC, Teo XQ, Chan WX, Radda GK, Lee PTH. A new hyperpolarized 13C ketone body probe reveals an increase in acetoacetate utilization in the diabetic rat heart. *Sci Rep* 2019;**9**:5532.
89. Seymour A-ML, Giles L, Ball V, Miller JJ, Clarke K, Carr CA, et al. In vivo assessment of cardiac metabolism and function in the abdominal aortic banding model of compensated cardiac hypertrophy. *Cardiovasc Res* 2015;**106**:249–260.
90. Le PL, Rider OJ, Lewis AJ, Ball V, Clarke K, Johansson E, et al. Increasing pyruvate dehydrogenase flux as a treatment for diabetic cardiomyopathy: a combined 13 C hyperpolarized magnetic resonance and echocardiography study. *Diabetes* 2015;**64**:2735–2743.
91. Timm KN, Perera CA, Ball V, Henry JA, West JA, Kerr M, et al. Investigating real-time metabolic flux changes in a rat model of doxorubicin-induced cardiotoxicity using hyperpolarized 13C magnetic resonance spectroscopy. *J Mol Cell Cardiol* 2018;**120**:34.
92. Cavallari E, Carrera C, Sorge M, Bonne G, Muchir A, Aime S, et al. The 13C hyperpolarized pyruvate generated by ParaHydrogen detects the response of the heart to altered metabolism in real time. *Sci Rep* 2018;**8**:2–10.
93. Abdurrachim D, Teo XQ, Woo CC, Chan WX, Lalic J, Lam CSP, et al. Empagliflozin reduces myocardial ketone utilization while preserving glucose utilization in diabetic hypertensive heart disease: a hyperpolarized 13 C magnetic resonance spectroscopy study. *Diabetes, Obes Metab* 2019;**21**:357–365.
94. Agger P, Hyldebrandt JA, Hansen ESS, Omann C, Bøgh N, Waziri F, et al. Magnetic resonance hyperpolarization imaging detects early myocardial dysfunction in a porcine model of right ventricular heart failure. *Eur Heart J Cardiovasc Imaging* 2020;**21**:93–101.

95. Bøgh N, Hansen ESS, Omann C, Lindhardt J, Nielsen PM, Stephenson RS, et al. Increasing carbohydrate oxidation improves contractile reserves and prevents hypertrophy in porcine right heart failure. *Sci Rep* 2020;**10**:8158.
96. Charles CJ, Lee P, Li RR, Yeung T, Ibrahim Mazlan SM, Tay ZW, et al. A porcine model of heart failure with preserved ejection fraction: magnetic resonance imaging and metabolic energetics. *ESC Hear Fail* 2020;**7**:93–103.
97. Cunningham CH, Lau JYC, Chen AP, Geraghty BJ, Perks WJ, Roifman I, et al. Hyperpolarized <sup>13</sup>C metabolic MRI of the human heart: initial experience. *Circ Res* 2016;**119**:1177–1182.
98. Haris M, Singh A, Cai K, Kogan F, McGarvey J, Debrosse C, et al. A technique for in vivo mapping of myocardial creatine kinase metabolism. *Nat Med* 2014;**20**:209–214.
99. Zhou Z, Nguyen C, Chen Y, Shaw JL, Deng Z, Xie Y, et al. Optimized CEST cardiovascular magnetic resonance for assessment of metabolic activity in the heart. *J Cardiovasc Magn Reson* 2017;**19**:95.
100. AlGhuraibawi W, Stromp T, Holtkamp R, Lam B, Rehwald W, Leung SW, et al. CEST MRI reveals a correlation between visceral fat mass and reduced myocardial creatine in obese individuals despite preserved ventricular structure and function. *NMR Biomed* 2019:e4104.
